# Supplementary material
Source: MDPI journal article supplement (https://www.mdpi.com/2227-9091/10/5/92)
Supplement: s1 [file s1]

Archive with 1 entries (1 files):
- risks-1522045-Supplementary.pdf
